# Supplementary material for: Frequency of deep vein thrombosis at admission for acute stroke and associated factors: a cross-sectional study
Source: Springer Nature journal article supplement (doi:10.1186/s12959-021-00315-5), 2021-09-06
Supplement: MOESM1 [file 19636698]

**Additional file 1.** Spearman rank correlation coefficients between significant variables

| $r_s$     | Age  | Sex  | BW   | Dd   | Hb   | Alb  | TG   | ALT  | A/A ratio | CRP  | NIH  | mRS  |
|-----------|------|------|------|------|------|------|------|------|-----------|------|------|------|
| Age       |      | 0.3  | -0.5 | 0.5  | -0.5 | -0.3 | -0.2 | -0.3 | 0.4       | 0.1  | 0.3  | 0.5  |
| Sex       | 0.3  |      | -0.6 | 0.1  | -0.3 | -0.1 | -0.1 | -0.2 | 0.2       | 0.0  | 0.1  | 0.2  |
| BW        | -0.5 | -0.6 |      | -0.3 | 0.4  | 0.3  | 0.3  | 0.2  | -0.4      | -0.0 | -0.2 | -0.3 |
| Dd        | 0.5  | 0.1  | -0.3 |      | -0.4 | -0.5 | -0.2 | -0.2 | 0.3       | 0.3  | 0.3  | 0.3  |
| Hb        | -0.5 | -0.3 | 0.4  | -0.4 |      | 0.5  | 0.2  | 0.4  | -0.3      | -0.2 | -0.2 | -0.3 |
| Alb       | -0.3 | -0.1 | 0.3  | -0.5 | 0.5  |      | 0.1  | 0.2  | -0.3      | -0.3 | -0.3 | -0.4 |
| TG        | -0.2 | -0.1 | 0.3  | -0.2 | 0.2  | 0.1  |      | 0.0  | -0.2      | -0.0 | -0.2 | -0.2 |
| ALT       | -0.3 | -0.2 | 0.2  | -0.2 | 0.4  | 0.2  | 0.0  |      | -0.6      | -0.1 | -0.0 | -0.3 |
| A/A ratio | 0.4  | 0.2  | -0.4 | 0.3  | -0.3 | -0.3 | -0.2 | -0.6 |           | 0.1  | 0.2  | 0.3  |
| CRP       | 0.1  | 0.0  | -0.0 | 0.3  | -0.2 | -0.3 | -0.0 | -0.1 | 0.1       |      | 0.2  | 0.2  |
| NIH       | 0.3  | 0.1  | -0.2 | 0.3  | -0.2 | -0.3 | -0.2 | -0.0 | 0.2       | 0.2  |      | 0.3  |
| mRS       | 0.5  | 0.2  | -0.3 | 0.3  | -0.3 | -0.4 | -0.2 | -0.3 | 0.3       | 0.2  | 0.3  |      |

Alb, albumin; ALT, alanine aminotransferase; AST, aspartate aminotransferase; A/A ratio, AST/ALT ratio; BW, body weight; CRP, high-sensitivity C-reactive protein; Dd, D-dimer; Hb, hemoglobin; mRS, pre-stroke modified Rankin scale score; NIH, National Institutes of Health Stroke Scale at admission;  $r_s$ , Spearman's rank correlation coefficient; TG, triglycerides
